# Supplementary material for: Mechanism of melanogenesis inhibition by Keggin-type polyoxometalates
Source: Royal Society of Chemistry journal article supplement (doi:10.1039/d3nr02303f), 2023-01-01
Supplement: d3nr02303f1.pdf [file d3nr02303f1.pdf]

## Mechanism of Melanogenesis Inhibition by Keggin-type Polyoxometalates

Guoxiang Chi <sup>a,#</sup>, Die Shuai <sup>a,#</sup>, Jiaxin Li <sup>c</sup>, Xiangsong Chen <sup>a</sup>, Han Yang <sup>a</sup>, Meijuan Zhao <sup>a</sup>, Zedong Jiang <sup>a</sup>, Li Wang <sup>a,\*</sup>, Bingnian Chen <sup>b,\*</sup>

<sup>a</sup> College of Ocean Food and Bioengineering, Jimei University, Xiamen 361021, PR China

<sup>b</sup> Xiang'an Hospital of Xiamen University, Xiamen 361021, PR China

<sup>c</sup> School of Life Sciences, Jilin University, Changchun 130012, PR China

\* Corresponding author at: College of Ocean Food and Bioengineering, Jimei University, Xiamen 361021, PR China

*E-mail address:* [wanglimerry@jmu.edu.cn](mailto:wanglimerry@jmu.edu.cn) (L. Wang).

\* Corresponding author at: Xiang'an Hospital of Xiamen University, Xiamen 361021, PR China

*E-mail address:* [3421836578@qq.com](mailto:3421836578@qq.com) (B. Chen).

# Guoxiang Chi and Die Shuai contributed equally to this work.

## Materials and methods

### Reagents

$\text{H}_5\text{GaMo}_{12}\text{O}_{40}$ <sup>1</sup>,  $\text{H}_4\text{SiMo}_{12}\text{O}_{40}$ <sup>2</sup> and  $\text{Na}_7\text{PMo}_{11}\text{MO}_{40}$  (M = Co, Ni, V, Zn)<sup>3,4</sup> were synthesized as previously described<sup>5</sup> with slight modifications. The synthesized POMs were characterized by Fourier transform infrared spectroscopy (FT-IR, Jasco FT/IR-480), UV/Vis absorption spectroscopy (Cary-50) and X-ray diffraction (XRD, Nippon Science Co., Ltd.).  $\text{PMo}_{12}$  was purchased from Sinopharm Chemical Reagent Co., Ltd, China. Tyrosinase, dimethyl sulfoxide (DMSO), and 3-(4,5-dimethyl-2yl)-2,5-diphenyltetrazolium bromide (MTT) were purchased from Sigma-Aldrich (USA). L-3,4-dihydroxyphenylalanine (L-DOPA) was bought from Shanghai Baoman Biotechnology Co., Ltd. (China). Trypsin-EDTA solution was purchased from Beijing Solarbio Science & Technology Co., Ltd. (China). Other chemicals were local products of analytical grade.

### Inhibition of tyrosinase activity assay

The tyrosinase inhibition assay was performed as previously described<sup>6-8</sup>. In this experiment, L-DOPA was used as a substrate to generate dopachrome with catalysis by tyrosinase, and the OD value after the reaction of the system was monitored by the microplate reader (Synergy H1MF) at a wavelength of 475 nm. Briefly, the reaction system was sequentially supplemented with 196  $\mu\text{L}$  L-DOPA dissolved in 50 mM phosphate buffer (pH 6.8), and 7  $\mu\text{L}$  of different concentrations of inhibitors completely dissolved in DMSO solution. Next, 7  $\mu\text{L}$  tyrosinase solution was added and the mixture was incubated at 30 °C for 10 min. The OD value of the 200  $\mu\text{L}$  reaction solution was monitored in a 96-well plate by using the microplate reader at 475 nm. As previously described<sup>6-8</sup>, the inhibitory effect ( $\text{IC}_{50}$ ), inhibition mechanism and inhibition type of POMs on tyrosinase were studied.

### Molecular simulation study

The 3D homology crystal model structure of *A. bisporus* tyrosinase (PDB ID: 2Y9X) was obtained from the Protein Data Bank (<http://www.rcsb.org>). Docking calculations were performed using the molecular operating environment (MOE) and Autodock (v4.2) software package<sup>8,9</sup>. The concrete parameters of the MOE used were Placement: Triangle Matcher, Rescoring 1: London dG, Refinement: Induced Fit, Rescoring 2: GBVI/WSA dG, Poses: 1000. Autodock calculations utilized the standard AutoDock force field and the Lamarckian genetic algorithm (LGA) search for the lowest energy docked conformation. Each docking experiment consisted of 500 independent LGA runs.

### **Fluorescence quenching assays**

Fluorescence measurements were carried out with a Cary Eclipse fluorescence spectrophotometer (Agilent, USA). The fluorescence signal ( $\lambda_{\text{ex}} = 280 \text{ nm}$ ) was recorded between 290 and 450 nm. Excitation and emission slits for these measurements were set to 5 and 10 nm, respectively. At different temperatures (298, 301 and 310 K), 1 mL of POMs ( $\text{GaMo}_{12}$ ,  $\text{SiMo}_{12}$  and  $\text{PMo}_{12}$ ) of different concentrations were incorporated with tyrosinase solution (2500 U/mL).

### **Cell culture**

The B16 melanoma cells were purchased from the Chinese Academy of Sciences Cell Bank (Shanghai, China). All these cell lines were maintained in a humidified atmosphere of 37 °C in a 5%  $\text{CO}_2$  and cultured in RPMI-1640 Medium (SH3080901, Hyclone, USA) with 10% FBS (Sigma) and 1% double antibody. These cells were then used for cell viability, tyrosinase inhibition and melanin content determination.

### **Cell viability assay (MTT)**

B16 melanoma cells ( $1 \times 10^5$  cells/well) were plated in 96-well plates. Each cell lines were treated with POMs at 12.5, 25, 50, 100, and 200  $\mu\text{M}$  for 72 hours. Then, cells were incubated with MTT solution

(10  $\mu$ L, 0.5 mg/mL) for 4 h. 200  $\mu$ L dimethyl sulfoxide (DMSO) was added to each well and incubated for 10 min at 37°C with mild shaking. The absorbance was measured at 570 nm<sup>10,11</sup>.

### **Cellular tyrosinase activity assay**

Cellular tyrosinase activity was determined by measuring the L-DOPA oxidation rate<sup>11</sup>. Each cell lines were treated with POMs at 0, 12.5, 25, 50, 100, and 200  $\mu$ M for 72 hours. Then, incubated cells were washed twice with PBS buffer (pH 7.4), and then 90  $\mu$ L PBS contenting 1% TritonX-100 mixed with 10  $\mu$ L L-DOPA (1.0 mg/mL) was added to each well. Cellular tyrosinase activity was then determined by measuring the absorbance at 470 nm.

### **Melanin content determination**

Each cell lines were treated with POMs at 12.5, 25, 50, 100, and 200  $\mu$ M for 72 hours. Cells were harvested by trypsinization and added to the collected medium. After centrifugation at 12000 rpm  $\times$  10 min, the separated melanin pigments were solubilized in 1 mL 1 M NaOH containing 10% DMSO was used at 80°C for 2 h. The melanin content was calculated from the absorbance intensity at 405 nm of standard melanin<sup>12</sup>.

### **DPPH radical scavenging assay**

DPPH was used for determination of free radical-scavenging activity<sup>13,14</sup>. Briefly, 2 mL of POMs solution was mixed with 2 mL of 0.1 mM DPPH ethanol solution and incubated at room temperature for 30 min in the dark. The absorbance was recorded at 517 nm.

### **ABTS radical scavenging assay**

The ABTS mixture (2.45 mM potassium persulfate with 7 mM ABTS salt) was combined with ethanol until an absorbance of 0.7 (at 734 nm). Then, POMs solution (0.1 mL) was mixed with 1 mL ABTS reagent and incubated for 6 min at room temperature. After that, the absorbance was measured at 734

nm wavelength<sup>14,15</sup>.

## Supplementary figures

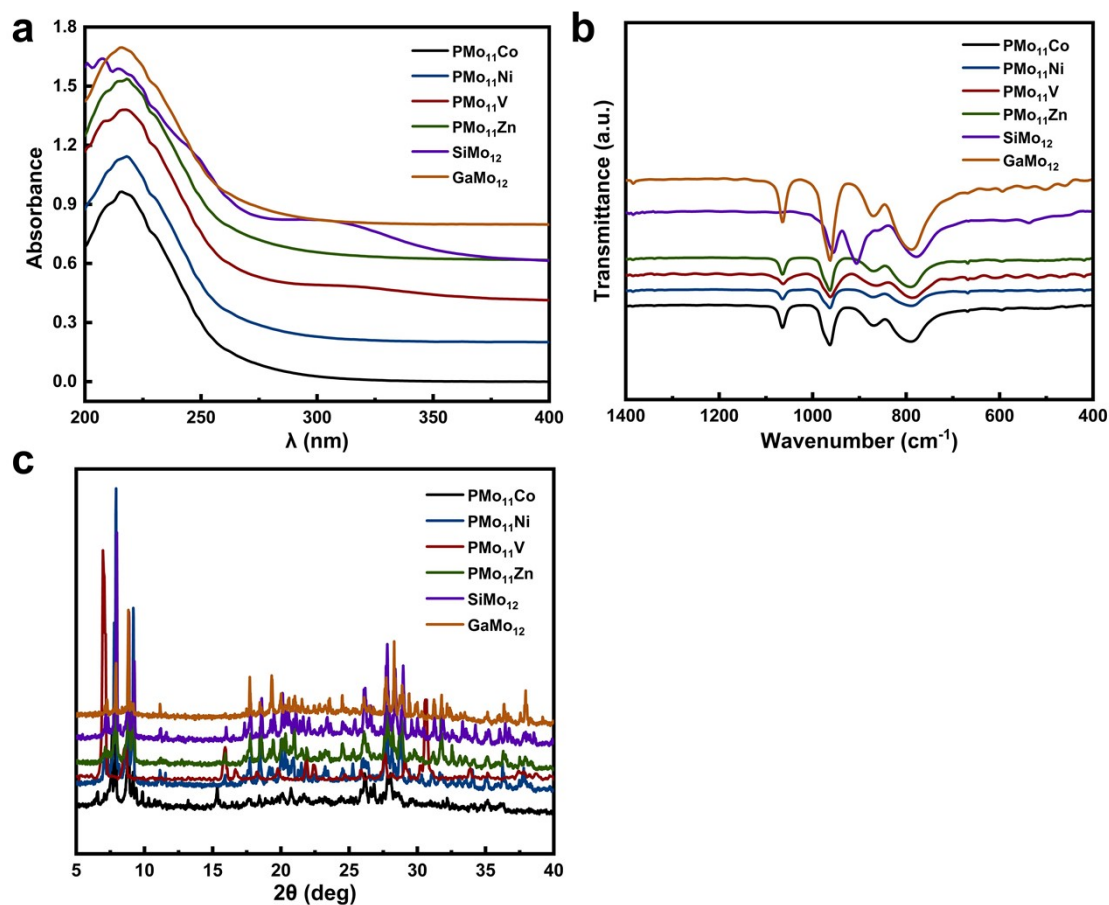

**Fig. S1. Structural characterization of the Keggin-type POMs ( $\text{GaMo}_{12}$ ,  $\text{SiMo}_{12}$  and  $\text{PMo}_{11}\text{M}$  ( $\text{M} = \text{Co}$ ,  $\text{Ni}$ ,  $\text{V}$ ,  $\text{Zn}$ )).** (a) UV/Vis absorption spectrum, (b) FT-IR spectrum, and (c) X-ray powder diffraction (XRD) spectra.

## Supplementary tables

**Table S1.** Reaction parameters calculated according to the Stern-Volmer equations of SiMo<sub>12</sub>.

| T (K) | K <sub>sv</sub> (M <sup>-1</sup> ) | K <sub>q</sub> (M <sup>-1</sup> S <sup>-1</sup> ) | R <sup>2</sup> | K (M <sup>-1</sup> ) | n    | R <sup>2</sup> | ΔH (kJ mol <sup>-1</sup> ) | ΔG (kJ mol <sup>-1</sup> ) | ΔS (J mol <sup>-1</sup> ) |
|-------|------------------------------------|---------------------------------------------------|----------------|----------------------|------|----------------|----------------------------|----------------------------|---------------------------|
| 298   | 1.15×10 <sup>4</sup>               | 1.15×10 <sup>12</sup>                             | 0.983          | 5.93×10 <sup>3</sup> | 0.93 | 0.966          |                            | -380.6                     |                           |
| 304   | 1.18×10 <sup>4</sup>               | 1.18×10 <sup>12</sup>                             | 0.992          | 2.87×10 <sup>2</sup> | 0.64 | 0.990          | -381.6                     | -380.6                     | -3.29                     |
| 310   | 5.43×10 <sup>4</sup>               | 5.43×10 <sup>12</sup>                             | 0.992          | 1.14×10 <sup>4</sup> | 0.85 | 0.988          |                            | -380.5                     |                           |

## References

1. Tsiganok, L. P., Vishnikin, A. B., & Maksimovskaya, R. I. (1989). UV, IR,  $^{71}\text{Ga}$  and  $^{17}\text{O}$  NMR Spectroscopic studies of the 12-Molybdogallate Heteropolyanion. *Polyhedron*, 8(23), 2739-2742.  
[https://doi.org/10.1016/S0277-5387\(00\)80529-X](https://doi.org/10.1016/S0277-5387(00)80529-X)
2. Rocchiccioli-Deltcheff, C., Fournier, M., Franck, R., & Thouvenot, R. (1983). Vibrational investigations of polyoxometalates. 2. Evidence for anion-anion interactions in molybdenum (VI) and tungsten (VI) compounds related to the Keggin structure. *Inorganic Chemistry*, 22(2), 207-216.  
<https://doi.org/10.1021/ic00144a006>
3. Lapkowski, M., Turek, W., Barth, M., & Lefrant, S. (1995). Changes in catalytic properties of substituted and unsubstituted heteropolyacids in conductive polymer matrix. *Synthetic Metals*, 69(1-3), 127-128.  
[https://doi.org/10.1016/0379-6779\(94\)02386-D](https://doi.org/10.1016/0379-6779(94)02386-D)
4. Mazari, T., Marchal, C. R., Hocine, S., Salhi, N., & Rabia, C. (2009). Oxidation of propane over substituted Keggin phosphomolybdate salts. *Journal of Natural Gas Chemistry*, 18(3), 319-324.  
[https://doi.org/10.1016/S1003-9953\(08\)60111-5](https://doi.org/10.1016/S1003-9953(08)60111-5)
5. Chi, G., Wang, L., Chen, B., Li, J., Hu, J., Liu, S., ... & Li, Y. (2019). Polyoxometalates: Study of inhibitory kinetics and mechanism against  $\alpha$ -glucosidase. *Journal of Inorganic Biochemistry*, 199, 110784.  
<https://doi.org/10.1016/j.jinorgbio.2019.110784>
6. Xing, R., Zheng, A., Wang, F., Wang, L., Yu, Y., & Jiang, A. (2015). Functionality study of  $\text{Na}_6\text{PMo}_{11}\text{FeO}_{40}$  as a mushroom tyrosinase inhibitor. *Food Chemistry*, 175, 292-299.  
<https://doi.org/10.1016/j.foodchem.2014.11.157>
7. Xing, R., Wang, F., Dong, L., Zheng, A. P., Wang, L., Su, W. J., & Lin, T. (2016). Inhibitory effects of



Na<sub>7</sub>PMo<sub>11</sub>CuO<sub>40</sub> on mushroom tyrosinase and melanin formation and its antimicrobial activities. *Food Chemistry*, 197, 205-211.

<https://doi.org/10.1016/j.foodchem.2015.10.119>

8. Chi, G., Xie, L., Zhao, M., Wang, L., Wang, F., Li, J., & Zheng, A. (2020). Biological evaluation of Keggin-type polyoxometalates on tyrosinase: Kinetics and molecular modeling. *Chemical Biology & Drug Design*, 96(5), 1255-1261.

<https://doi.org/10.1111/cbdd.13734>

9. Chi, G., Cao, X., Li, Q., Yao, C., Lu, F., Liu, Y., ... & He, N. (2022). Computationally guided enzymatic studies on Schizochytrium-sourced malonyl-CoA: ACP transacylase. *Journal of Agricultural and Food Chemistry*, 70(43), 13922-13934.

<https://doi.org/10.1021/acs.jafc.2c05447>

10. Wu, Q., Bai, P., Xia, Y., Xia, Y., Xu, B., Dai, K., ... & Tsim, K. W. (2020). Capsaicin inhibits the expression of melanogenic proteins in melanocyte via activation of TRPV1 channel: identifying an inhibitor of skin melanogenesis. *Journal of Agricultural and Food Chemistry*, 68(50), 14863-14873.

<https://doi.org/10.1021/acs.jafc.0c06321>

11. Li, J., Lin, Z., Tang, X., Liu, G., Chen, Y., Zhai, X., ... & Cao, Y. (2020). Oxyresveratrol extracted from *Artocarpus heterophyllus* Lam. inhibits tyrosinase and age pigments in vitro and in vivo. *Food & Function*, 11(7), 6595-6607.

<https://doi.org/10.1039/D0FO01193B>

12. Wang, W., Chen, L., Wang, W., Zhang, J., Engelhardt, U. H., & Jiang, H. (2022). Effect of active groups and oxidative dimerization on the antimelanogenic activity of catechins and their dimeric oxidation products. *Journal of Agricultural and Food Chemistry*, 70(4), 1304-1315.

<https://doi.org/10.1021/acs.jafc.1c07028>

13. Yang, J., Chen, J., Hao, Y., & Liu, Y. (2021). Identification of the DPPH radical scavenging reaction adducts of ferulic acid and sinapic acid and their structure-antioxidant activity relationship. *LWT*, 146, 111411.

<https://doi.org/10.1016/j.lwt.2021.111411>

14. Chaves, N., Santiago, A., & Alías, J. C. (2020). Quantification of the antioxidant activity of plant extracts: Analysis of sensitivity and hierarchization based on the method used. *Antioxidants*, 9(1), 76.

<https://doi.org/10.3390/antiox9010076>

15. Teng, C., Qin, P., Shi, Z., Zhang, W., Yang, X., Yao, Y., & Ren, G. (2021). Structural characterization and antioxidant activity of alkali-extracted polysaccharides from quinoa. *Food Hydrocolloids*, 113, 106392.

<https://doi.org/10.1016/j.foodhyd.2020.106392>
